# Supplementary material
Source: ML conference proceedings conference paper supplement (https://openreview.net/forum?id=pY9MHwmrymR)
Supplement: supplementary_material [file attachment]

## A Numerical integration schemes

We briefly review the time integration schemes that we consider in this study: forward Euler (FE), leapfrog (LF), Runge-Kutta 4 (RK4), backward Euler (BE), and the second-order backward differentiation formula (BDF2). Other sources also discuss these integration schemes, for example Süli and Mayers [49], Hairer et al. [12], Hairer and Wanner [11].

Time integration with the explicit Euler method leads to

$$x_k = x_{k-1} + \delta t f(x_{k-1}),$$

where  $\delta t > 0$  is the time step size and  $f$  is the right-hand side function. The explicit Runge-Kutta 4 scheme is

$$x_k = x_{k-1} + \frac{\delta t}{6} (h_1 + 2h_2 + 2h_3 + h_4),$$

where

$$\begin{aligned} h_1 &= f(x_{k-1}) & h_2 &= f(x_{k-1} + \delta t / 2 h_1) \\ h_3 &= f(x_{k-1} + \delta t / 2 h_2) & h_4 &= f(x_{k-1} + \delta t / 2 h_3) \end{aligned}$$

for  $k = 1, \dots, K$ . For leapfrog integration we separate the components of the state  $x = (q, p)$  and  $f(q_k, p_k) = (\dot{q}_k, \dot{p}_k)$  and compute:

$$\begin{aligned} p_{k+1/2} &= p_k + \frac{\delta t}{2} \dot{p}_k \\ q_{k+1} &= q_k + \dot{q}(q_k, p_{k+1/2}) \delta t \\ p_{k+1} &= p_{k+1/2} + \frac{\delta t}{2} \dot{p}(q_{k+1}, p_{k+1/2}) \end{aligned}$$

where the notation  $\dot{q}(q_k, p_{k+1/2})$  denotes the  $\dot{q}$  component of  $f(q_k, p_{k+1/2})$  and analogously for  $\dot{p}$ .

We also consider the implicit Euler method, which is given by the potentially nonlinear equation

$$x_k - \delta t f(x_k) = x_{k-1}$$

that is solved in each time step  $k = 1, \dots, K$ .

We tested another implicit method, BDF2. This is a second order multistep method with the formula given by

$$x_k - \frac{4}{3}x_{k-1} + \frac{1}{3}x_{k-2} = \frac{2}{3}\delta t f(t_k, x_k)$$

To kickstart this method, which requires two steps of history, we initially do one step of backward Euler. This maintains the stability and error properties of the method.

## B Learning methods

### B.1 Training

Training for both step and derivative problem formulations is done with the Adam [17] optimizer for all neural networks, except the neural network kernel which uses standard stochastic gradient descent with learning rate 0.001 and weight decay 0.0001. With the Adam optimizer, no weight decay is used, and most networks use a learning rate of  $1 \times 10^{-3}$ . Exceptions to this are: CNNs, MLPs and the u-net for Navier-Stokes, and CNNs and MLPs on the spring mesh. For both of these systems the CNNs and MLPs use a learning rate of  $1 \times 10^{-4}$  and the u-net uses  $4 \times 10^{-4}$ .

On the Navier-Stokes system we also perturbed each batch of training data with normally-distributed noise with a variance of  $1 \times 10^{-3}$ . For step prediction the previous step was corrupted and the subsequent step left uncorrupted. For derivative prediction, the derivatives were updated to correct for the noise (i.e.  $\tilde{x} = x + \mathcal{N} \implies \tilde{\dot{x}} = \dot{x} - \mathcal{N}$  where  $\mathcal{N}$  is the sampled noise). This is inspired by the approach taken in Pfaff et al. [34] and we found it to improve stability for neural networks on the Navier-Stokes system.

The number of training epochs varies based on the target system. On spring, wave, and spring mesh the networks are trained for 400, 250, 800, and 800 epochs, respectively. When reporting

evaluation errors below, we average errors over all time steps of each randomly-sampled trajectory in the held-out evaluation set.

We train three independent copies of each neural network. When evaluating these, each test trajectory is evaluated with each duplicate neural network and the performance results are collected and processed together. Variance in plots of these results is produced both by the differences in performance for the three duplicated neural networks, and differing performance across the sampled evaluation trajectories.

## B.2 KNN regressor

We use a  $k$ -nearest neighbors regressor to predict the value of the state derivatives, using  $k = 1$ . With this method  $\tilde{f}_\theta(\tilde{x}_k^{(i)})$  finds the closest matching point in the training set, and uses that point's associated derivatives as its approximation,  $\tilde{x}_k^{(i)}$  in the case of derivative prediction. For direct step prediction, the KNN finds the closest point and returns the next time step from that point's trajectory in the training set. We use the KNN implemented in scikit-learn [32], along with its default Minkowski metric.

## B.3 Kernel methods

Kernel methods provide a nonparametric regression framework [48]. In this benchmark we consider dot-product kernels of the form  $k(x, x') = \eta(\langle x, x' \rangle)$ , which can be efficiently implemented in their primal formulation using random feature expansions [36] via the representation

$$k(x, x') = \mathbb{E}_{z \sim \nu} [\rho(\langle x, z \rangle) \rho(\langle x', z \rangle)] \approx \frac{1}{L} \sum_{l=1}^L \rho(\langle x, z_l \rangle) \rho(\langle x', z_l \rangle),$$

where  $\nu$  is a rotationally-invariant probability distribution over parameters and  $z_l \sim \nu$  iid. The resulting maps  $x \mapsto \rho(\langle x, z_l \rangle)$  are *random features*, associated with a shallow neural network with ‘frozen’ weights. While further choices of kernel may be considered in the future, dot-product kernels have flexible approximation properties and are easily scalable [40].

In our experiments, we use  $\rho = \text{ReLU}$  and  $L = 32768$  random features and train using kernel ridge regression. We do not apply this approach to our Navier-Stokes system as its large state dimension makes achieving a sufficiently large set of random features infeasible.

## B.4 Deep networks

**MLPs** We apply simple multilayer perceptron (MLP) networks in a variety of sizes. The configuration of the MLPs used varies with the target system. In particular, we divide our two systems into two classes: those with smaller state dimension (the spring and wave systems), and those with a larger state dimension (the spring mesh, and the Navier-Stokes problem). We describe these architectures in terms of “depth” and “width.” The depth denotes the number of fully-connected operations in the MLP, so that for a depth of  $d$  there are  $d - 1$  hidden layers. The width is the size of each hidden layer; the input and output dimensions are fixed by the state dimension of the system. The MLPs use tanh activations.

For the small systems we use three MLP architectures: (1) a depth of 2 and a hidden dimension (width) of 2048, (2) a depth of 3 and width of 200, and (3) a depth of 5 and a hidden dimension of 2048. For the large systems, we use two architectures: (1) a depth of 4 and width of 4096, and (2) a depth of 5 and width of 2048. The  $10 \times 10$  spring mesh merges both sets of MLP architectures.

For the Navier-Stokes and spring mesh systems, the MLP gets as input both the current network state, and a one-hot mask indicating which points in the discrete simulation space are “fixed,” meaning either a boundary point, a point in an obstacle, or an immovable, fixed particle.

**CNNs** We also test several feed-forward convolutional neural networks. These use ReLU activations and we specify their architectures by a kernel size, and internal channel count. We use these simple CNNs only on the larger systems: the spring mesh and the Navier-Stokes. For both of these systems we test two CNN architectures: both have a kernel size of  $9 \times 9$  and, respectively, 32 and 64 channels internally. The number of input channels is fixed by the system. Both systems have

five: for the spring mesh, two channels each for position and momentum; and for the Navier-Stokes system two channels for velocity, one for pressure field, and two more for one-hot masks highlighting boundaries and the obstacles.

**U-net** Finally, we implement another convolutional network—only for the Navier-Stokes system—a u-net following the architecture tested in Thuerey et al. [51]. That work applied this architecture to another Navier-Stokes problem, predicting a single step of flow about an airfoil profile. Here we adjust the input and output channels of this architecture, and test on our Navier-Stokes problem, performing several recurrent steps of derivative or step prediction around circular obstacles.

The architecture itself consists of seven convolution operations on both the downsampling and upsampling side. The convolutions have a mix of  $4 \times 4$  and  $2 \times 2$  kernels, and have strides of two. The network includes skip connections common to u-net-style architectures. With each downsampling, the number of channels is doubled starting from an internal channel count of 64. Our Navier-Stokes system has a grid size of  $221 \times 42$ . To accommodate the amount of downsampling in this architecture we first upsample to  $256 \times 256$  with bilinear interpolation.

### B.5 Other experimental details

Our experiments were conducted on NYU’s research HPC system, Greene. Neural networks were predominantly trained using NVIDIA RTX8000 GPUs, with a few runs on V100 GPUs. CPU-based runs used Intel Xeon Platinum 8268 CPUs. Our neural networks required, on average, approximately two hours to train and we consumed in total approximately 1785 hours of GPU time, across all our experiments, including some early experimental and exploratory runs not discussed here. Our dataset generation and non-neural network evaluation runs, which do not use GPUs, consumed approximately 2270 core-hours of CPU time, again including some exploratory runs. Datasets were generated using CPUs only. Neural network training and evaluation passes ran using GPUs through PyTorch. Evaluations and trainings of baseline numerical integrators and KNNs ran on CPU only.

## C Experiment results

To illustrate the error distribution for each neural network over the evaluation sampling distribution, we plot the errors as a box plot. Figures 6, 7, 8, 9, and 10 show these error distributions, one plot for each system configuration.

Each plot is divided into two panes: one for derivative, and the other for step prediction. The datasets and training protocols followed are identical between the two task formulations. In each, the boxes are grouped first according to learning method, labeled at the bottom on the  $x$ -axis. For derivative prediction, the boxes are assembled into sub-groups according to the integrator applied (forward Euler/FE, leapfrog/LF, RK4, backward Euler/BE, or BDF2). These integrators are also indicated by the color of the box. In each group, from left to right the boxes become darker; this indicates the increasing training set size (see Table 1). The final box is hatched; this shows the evaluation results on the out-of-distribution set for the network exposed to the largest training set.

The boxes illustrate the distribution over per-trajectory average errors. For each system configuration (a system, derivative/step prediction, learning method, integrator, and particular training set size) we compute the per-step MSE against a ground truth result; these per-step errors are averaged to produce an error estimate for the trajectory. We also train three independent instantiations of each neural network architecture and evaluate each of these on all trajectories independently. These three repetitions of each trajectory for each network are included as part of the distribution in the box plot. The KNNs and numerical integrators are run a single time each. The errors of these different sampled trajectories form the distribution summarized by the box plot. The variance in the results is produced by a combination of the training results for the three copies of each network, and by the varying performance on each of the sampled evaluation trajectories. These plots were generated using Matplotlib’s [14] box plot routines. The box itself ends at the first and third quartiles of the data and the line in the middle is placed at the median of the data. The whiskers extend past the box by 1.5 times the size of the box. Circles are plotted for outlier points which lie outside the range of the whiskers. The plots here have a logarithmic  $y$ -axis to accommodate the wide range of error values, thus the boxes do not appear symmetric.

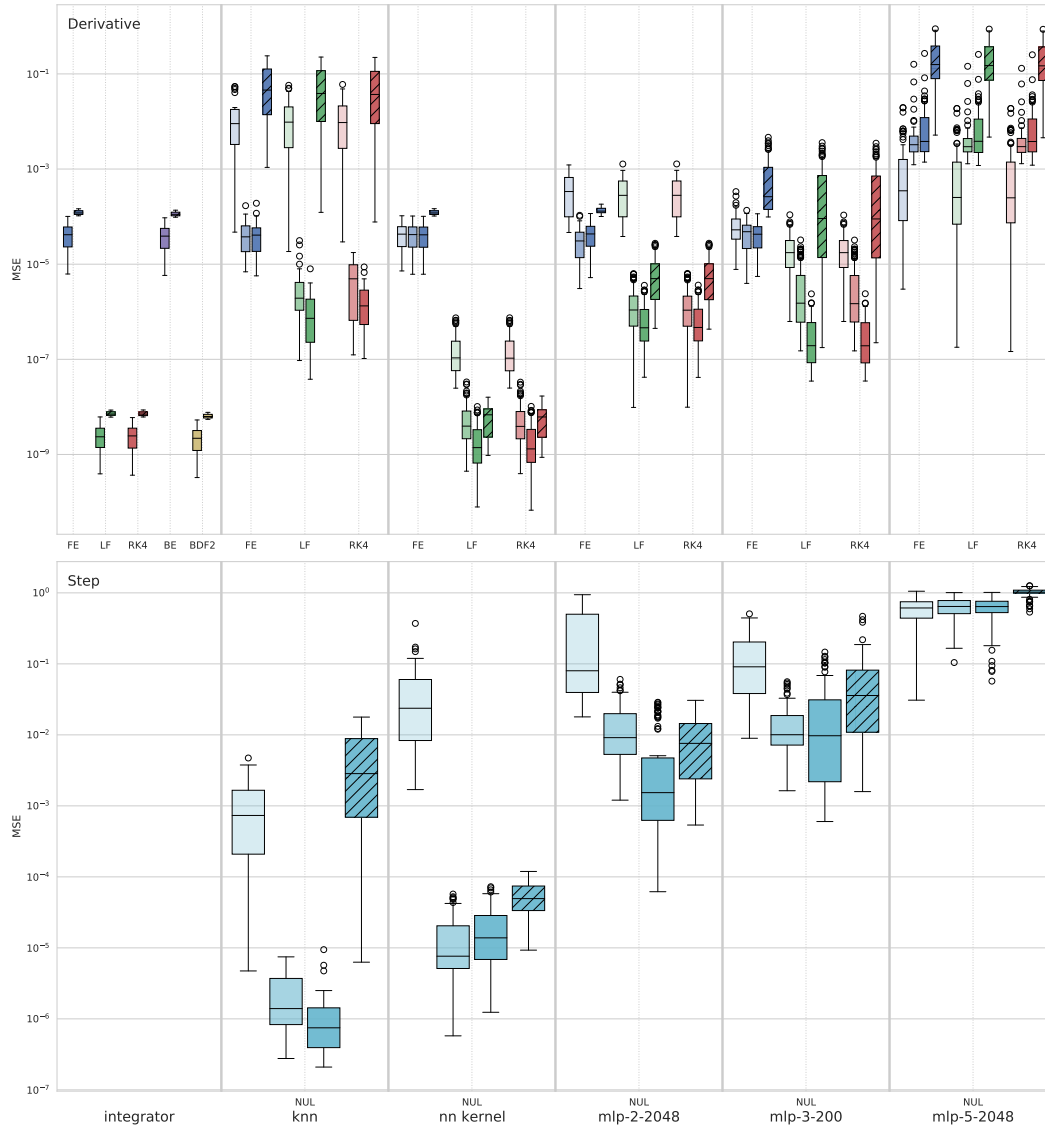

Figure 6: Error distribution for spring system for multiple training set sizes as well as out-of-distribution results.

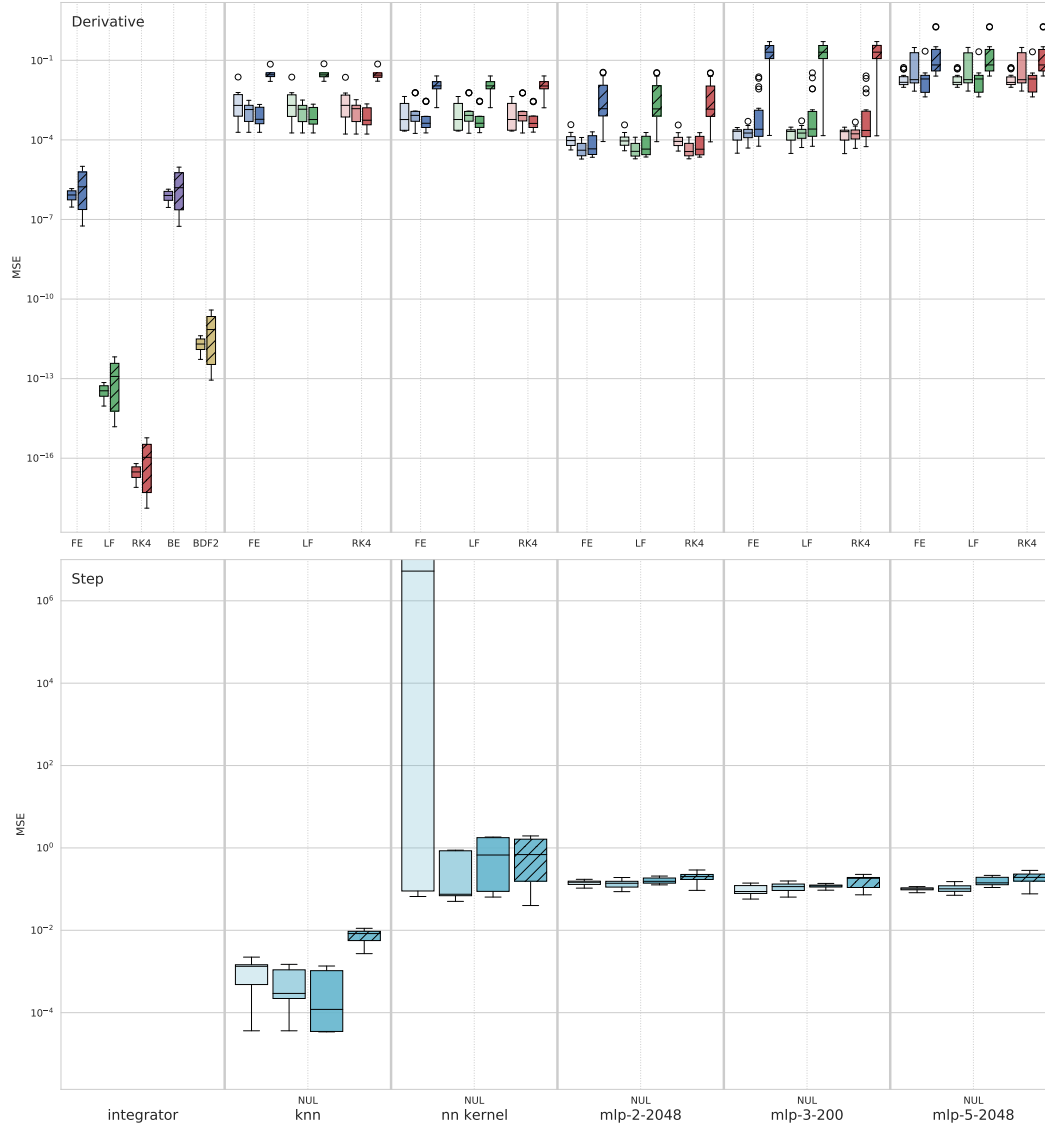

Figure 7: Error distribution for wave system for multiple training set sizes as well as out-of-distribution results.

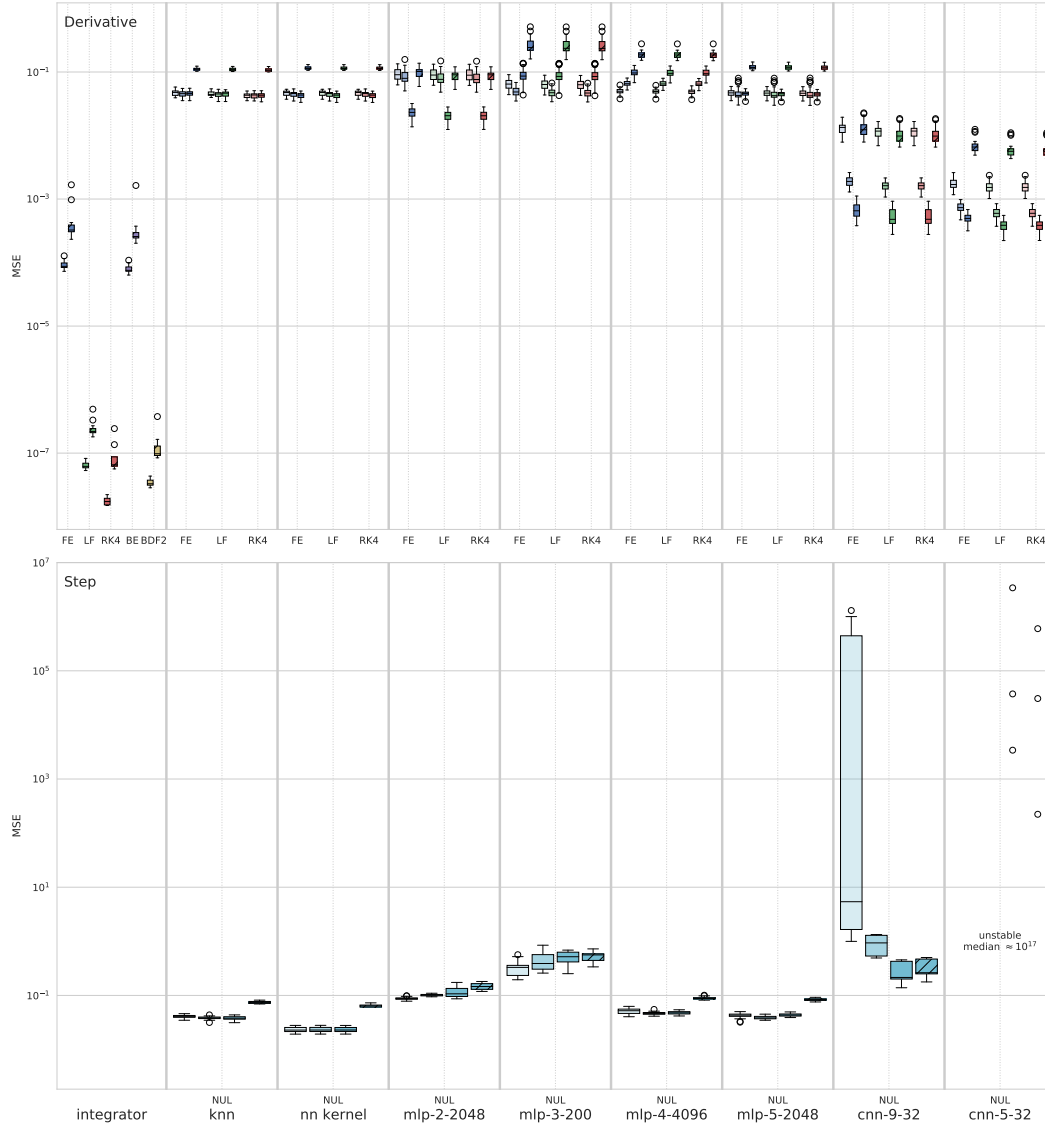

Figure 8: Error distribution for  $10 \times 10$  spring mesh system for multiple training set sizes as well as out-of-distribution results.

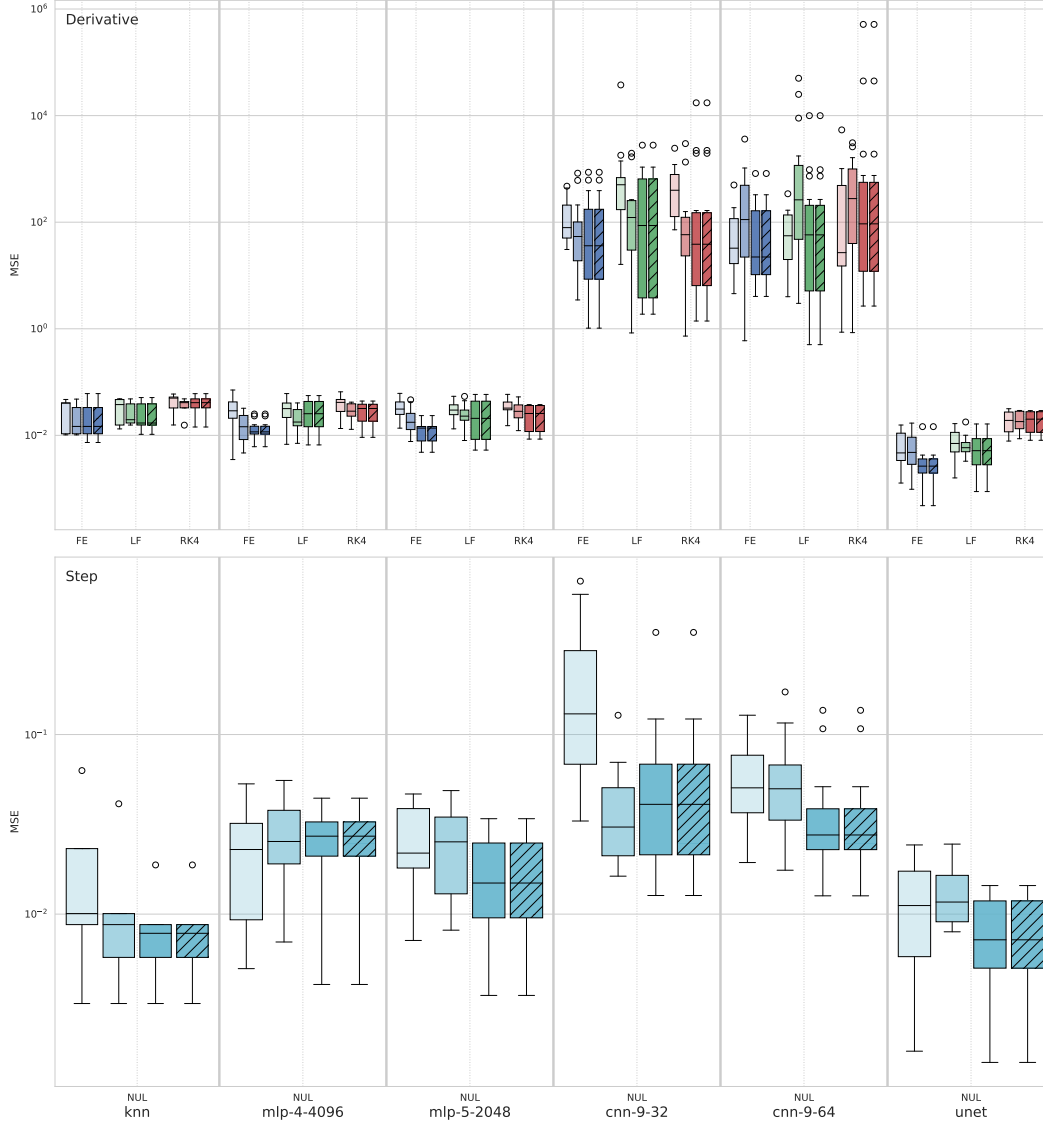

Figure 9: Error distribution for Navier-Stokes system for multiple training set sizes, and out-of-distribution results. Each trajectory has a single randomly-positioned obstacle. Note that this system does not have results for plain numerical integration.

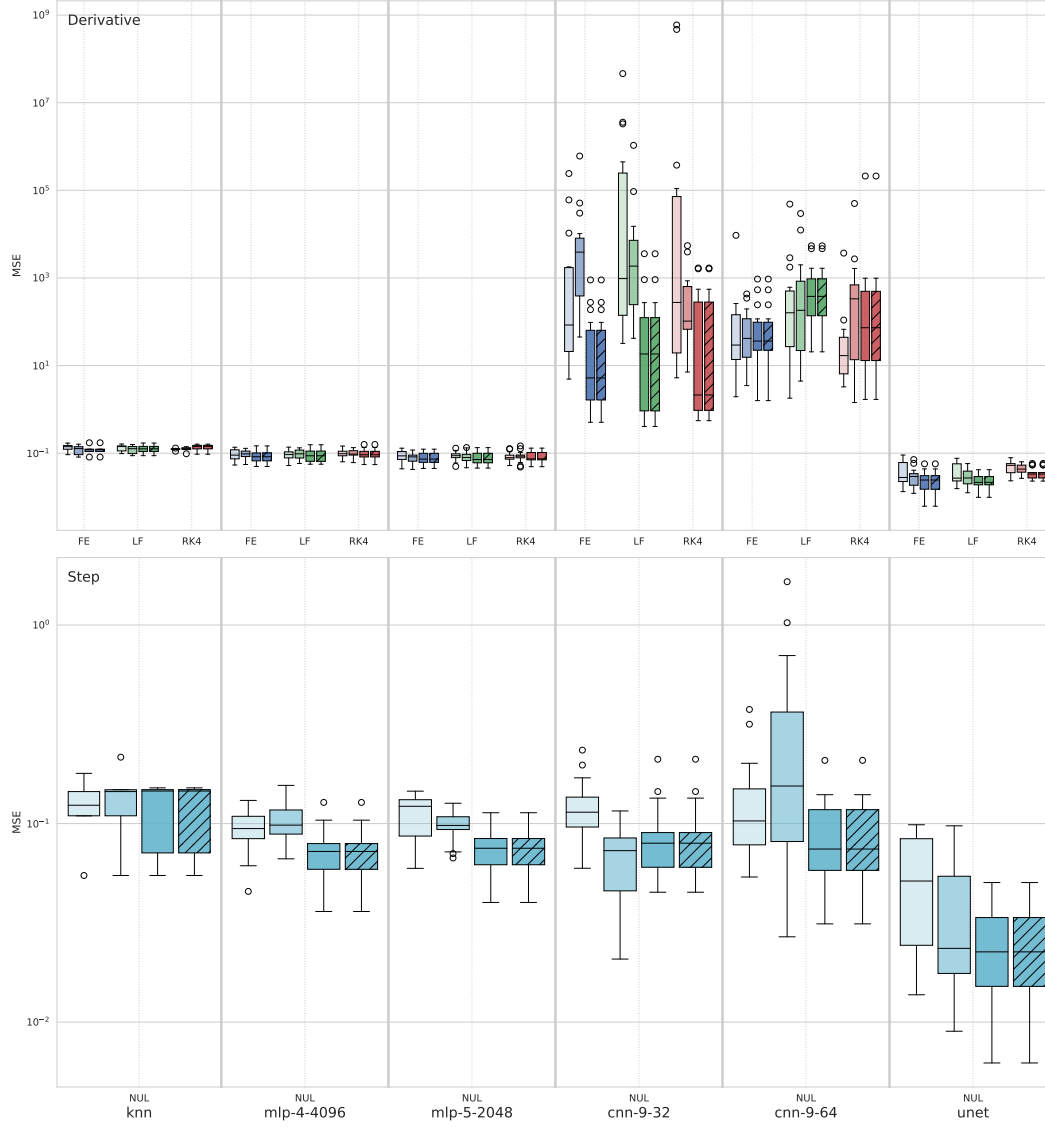

Figure 10: Error distribution for Navier-Stokes system for multiple training set sizes, and out-of-distribution results. Each trajectory has four randomly-positioned obstacles.



### C.1 Weighted errors

In most cases, due to accumulated errors, per-step errors increase as numerical integration proceeds away from the initial condition. To compensate for this trend and in an effort to explore the impact of early vs. late step errors, we include several plots of error distributions for which each time step’s MSE has been weighted. To produce these weights, each step’s MSE is scaled by a value  $1/\exp(\ln(10^2) \cdot p_t)$  where  $p_t \in [0, 1]$  is a scalar representing the proportional time of the step (zero at start of the trajectory, and one at the end). This produces an exponential decay from the initial steps to the end and reduces the contribution of the final steps by two orders of magnitude. These scaled MSEs are then averaged for each trajectory and each neural network retraining as in the plots above.

The results of these distributions for the Navier-Stokes system—both single- and multi-obstacle forms—are included in Figure 11 and Figure 12 below. A change in the relative behavior of the learned methods is most visible in the step prediction results in Figure 12. Without the weighting, many of the learning methods perform comparably to the KNN; however when emphasizing early steps, these methods demonstrate improved errors relative to the re-weighted KNN errors. This indicates that the learned methods outperform the accuracy of the KNN on the early steps, but are somewhat unstable as the simulation progresses.

For other systems, we did not observe significant changes in relative performance of the learned methods. MSE distributions shifted, but roughly in proportion to each other. This represents a greater general stability in the learned methods on other systems, likely reflecting the more predictable long-term behavior of the other systems. The spring system is periodic, the wave system is stable over time, and the spring mesh system has an energy decay term which simplifies and stabilizes its long-term evolution. As a result, in most cases, successfully learning the target task permits the learned methods to maintain some stability over time, which decreases the relative effect of the per-step weighting.

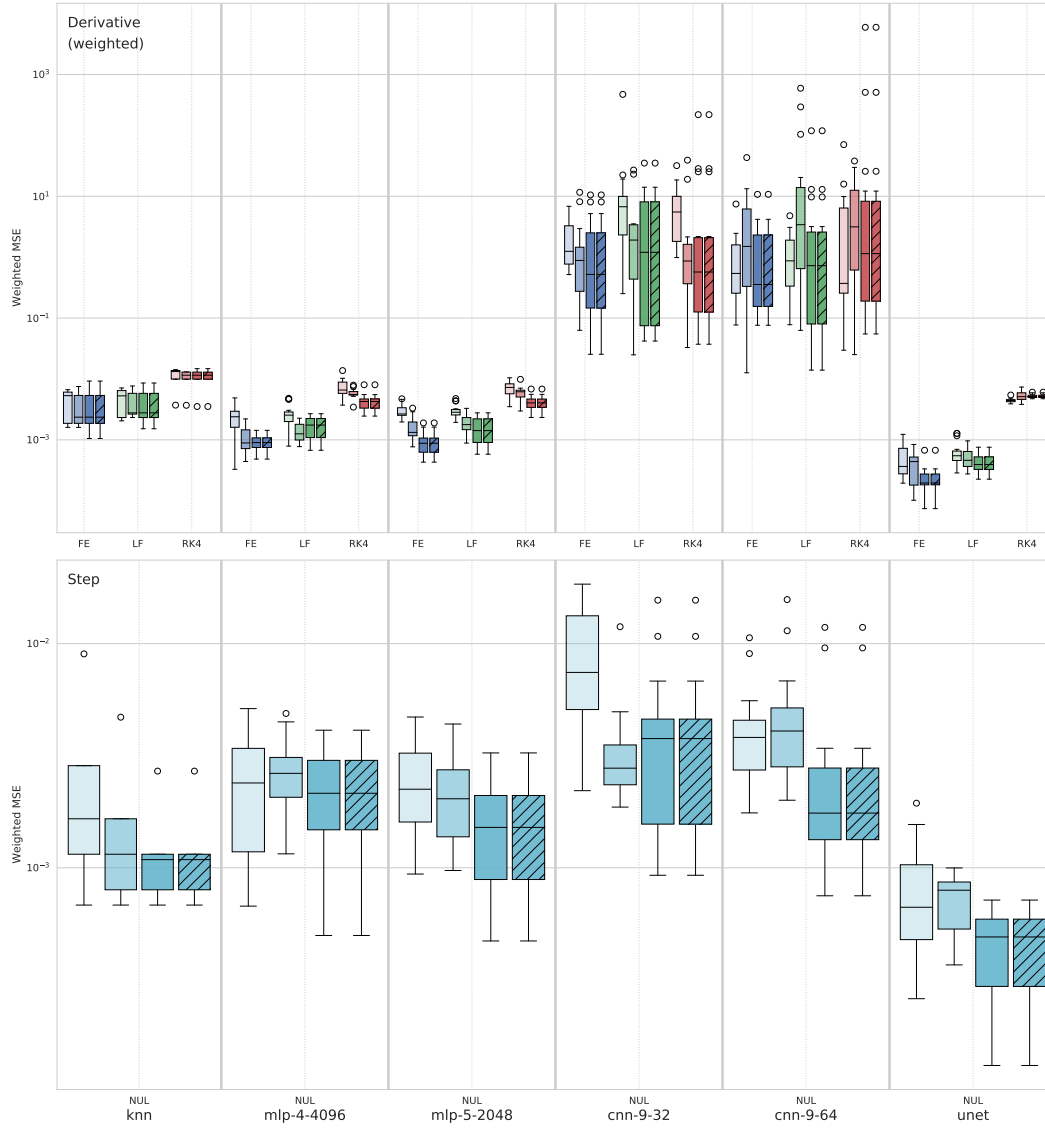

Figure 11: Error distribution for Navier-Stokes system for multiple training set sizes, and out-of-distribution results. Each trajectory has a single randomly-positioned obstacle. Per-step errors are weighted to decrease the contribution of later time steps with higher errors.

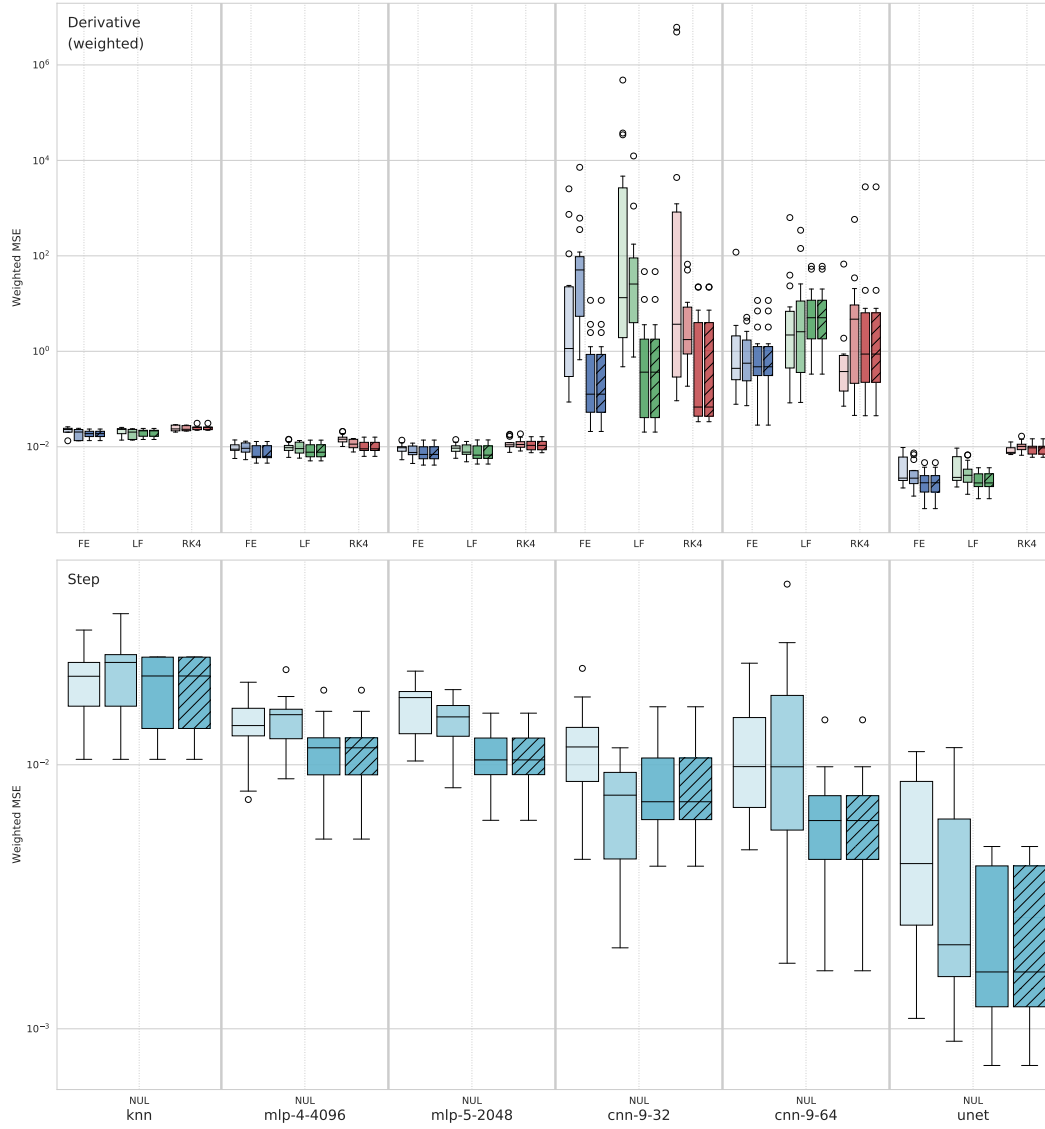

Figure 12: Error distribution for Navier-Stokes system for multiple training set sizes, and out-of-distribution results. Each trajectory has four randomly-positioned obstacles. Per-step errors are weighted to decrease the contribution of later time steps with higher errors.

## D Dataset and software documentation

This section contains information documenting the contents, structure, and intended uses of the datasets used in this work.

### D.1 Overview

The datasets used in this work consist of snapshots gathered from numerical simulations of dynamical systems. These simulations were carried out as part of this work and the software used to generate them as well as stored outputs are made available for use and further modification. The software source code is available under the MIT license, and the stored data is available under a Creative Commons Attribution 4.0 license (CC BY 4.0).

Simulations are carried out for four system types, described in greater detail in the main work, above: (1) spring, (2) wave, (3) spring mesh, and (4) Navier-Stokes. Each simulation’s outputs are intended to be used for developing and testing machine learning methods for numerical simulations. They include snapshots of each system’s state across several data channels, as well as time derivatives, either of which can be used as learning targets.

An archival copy of the stored data and software source code has been placed in the NYU Faculty Digital Archive (<https://archive.nyu.edu/handle/2451/63285>) for long-term storage. The source code is also available on GitHub at <https://github.com/karlotness/nn-benchmark>.

The stored data for each simulation type is stored in two components: a JSON file containing metadata for the particular simulation, and an associated uncompressed NumPy .npz-formatted file containing the numerical results. Details of the contents of these files are provided below. Our experiments were carried out in Python and these files are readable using the Python standard library’s json module and the widely-used NumPy library. For other languages or environments, the .npz files are ZIP archives containing NumPy .npy files whose format is documented by NumPy <https://numpy.org/doc/stable/reference/generated/numpy.lib.format.html>.

### D.2 Stored format

Each dataset is a directory storing two files: “system\_meta.json” and “trajectories.npz”. The .npz file contains several NumPy array records with various shapes and data types. The names of each of these records are referenced in the JSON file (documented below). When loading the data from these systems these names should be treated as opaque and always sourced from the JSON-formatted metadata. In some cases, the same name is referenced several times for purposes of data deduplication. The .npz file is used for bulk storage of numerical data, separated from general metadata.

The simulation snapshots are divided into trajectories, each defined by a particular initial condition from which a series of snapshots is taken at several later time steps, by numerical simulation. Each trajectory is divided into several “channels” of data, in particular separating various state quantities, state time derivatives, and masks marking special spatial locations for that trajectory, particular to that system. The JSON file also contains trajectory-level parameter information, and settings for global system-level parameters.

The stored data sets are intended to be used to test against the same snapshots used in this work, without needing to configure the dependencies necessary to generate the snapshots. The process of running the simulations and reproducing the tests described in this work is discussed in a separate section, below.

#### D.2.1 Top-level object contents

The JSON-formatted metadata file contains important information used when loading these data sets. The contents of certain sections vary by simulated system to reflect differences in relevant parameters and other generic data. However, each has a similar global structure. Each JSON file contains a top-level object with the same four keys: `system`, `system_args`, `metadata`, and `trajectories`.

The value of `system` is a string identifying which system is stored in that dataset. Its value will be one of: “spring”, “wave”, “spring-mesh”, or “navier-stokes”.

The value of `system_args` is another object storing the parameters which were passed to the simulation code to generate these snapshots. These contents vary per system, but may be useful in understanding what settings were configured for the simulators.

The `system_args` object stores several key-value pairs which vary by system reflecting different global parameters which apply to every trajectory in the set. However it also always contains a key `system_args.trajectory_defs` whose value is an array of objects which contain parameters which may vary per-trajectory.

In addition to parameters in these objects which vary by system, several are always present with the same meaning: `num_time_steps`, `time_step_size`, and `subsample`. The field `num_time_steps` is an integer which sets the number of snapshots which are to be generated, including the first snapshot which contains the initial condition. The parameter `time_step_size` is a floating-point value which sets the time difference between each stored snapshot. The physical effect of the time step varies per system. The parameter `subsample` is an integer (1 or larger) which allows generating the dataset on a finer time grid than is reflected in the stored trajectory. Values greater than 1 cause the simulator to run at a time step of `time_step_size/subsample` for `num_time_step · subsample` steps, and to discard intermediate snapshots to produce an output at an un-sampled stride. This allows generating data sets at a higher simulation quality while keeping the same end time and desired number of steps.

The `metadata` key stores an object with key-value pairs providing system-dependent information on particular global parameters.

The `trajectories` key contains an array of objects giving information about the stored trajectory data. These are likely to be the most useful when loading the snapshots as this object also provides a mapping from each system’s data channels to the array in the dataset’s “trajectories.npz” file.

The objects in the `trajectories` array each contain system-dependent per-trajectory metadata which will be discussed below, but as elsewhere several entries are always present. The first is a `name` entry which gives a human-readable name for the trajectory. The keys `num_time_steps` and `time_step_size` have the same value and function as discussed above. The `timing` entry contains an object with information on timing of the data generation process. At present this object has one entry of its own: `traj_gen_time`, which gives the time to generate this trajectory measured in seconds.

Beyond these, each object in the `trajectories` array contains a key `field_keys` storing an object. This object has keys for each data channel in this system whose values are strings giving the name of a record stored in the “trajectories.npz” file. These mappings are the best way to determine the correspondence between a trajectory in the dataset and the stored bulk arrays which make up its snapshot data. The names used for keys follow a general pattern, usually prefixed with the name of the trajectory discussed above, but they *should* be treated as opaque and always sourced from the JSON files. This mapping is in some cases used to reduce duplication and some array records may be referenced multiple times.

Next, we discuss per-system variation in the overall structure listed above, describing the metadata components and data channels which are specific to each system.

## D.2.2 Spring

This system is identified by a `system` entry with value “spring”.

Under `system_args` this system has no additional global parameters, only per-trajectory parameters in the `system_args.trajectory_defs` array. These per-trajectory objects have a system-specific `initial_condition` attribute which is a sub-object with attributes `q` and `p`, both of which are floating-point, giving the initial values for the position and momentum of the simulated spring.

The `metadata` object contains one attribute, `n_grid` for consistency with the wave system, below. Its value is always the integer 1.

The objects in the `trajectories` array contain only the standard values defining the number of time steps and the name of each trajectory. The object `field_keys` defines name mappings for the data channels of this system described below. Some additional details for each channel are included in Table 3.

The channels “q” and “p” give the position and momentum of the spring, respectively. Both values evolve in the one-dimensional space of the system. Channels “dqdt” and “dpdt” are time derivatives of these two quantities. The vector “t” gives the time of each snapshot in the trajectory.

Table 3: Data channels for the Spring system.  $N_t$  denotes the number of time steps in the trajectory.

| Channel name | Shape      | Data type |
|--------------|------------|-----------|
| q            | $(N_t, 1)$ | float64   |
| p            | $(N_t, 1)$ | float64   |
| dqdt         | $(N_t, 1)$ | float64   |
| dpdt         | $(N_t, 1)$ | float64   |
| t            | $(N_t)$    | float64   |

### D.2.3 Wave

This system is identified by a `system` entry with value “wave”.

Under `system_args`, the wave system has two global parameters: `n_grid` and `space_max`. The parameter `n_grid` controls how many points are sampled on a regular, one-dimensional spatial grid covering the interval  $[0, \text{space\_max}]$ , with a periodic boundary condition. `space_max` is a floating-point value controlling the end point of this interval.

System-specific per-trajectory elements in `system_args.trajectory_defs` are `wave_speed`, `start_type`, and `start_type_args`. The `wave_speed` parameter is a floating-point value controlling the distance the wave pulses travel in a unit of time.

The other two parameters control the shape and position of the initial pulse. `start_type` is a string parameter selecting the type of pulse to form; at present only “cubic\_splines” is supported. The value of `start_type_args` is an object with additional parameters which affect the starting pulse. For a cubic spline these are: `height`, `width`, and `position`. Each of these is a floating-point value which scales the height and width of the pulse, and selects its center point in the spatial interval.

The metadata object repeats the values of the `n_grid` and `space_max` attributes described above.

Each object in the `trajectories` array contains the trajectory’s value of the `wave_speed` parameter discussed above. There are no further system-specific entries in these objects, other than the data channels. Some attributes of these are given in Table 4.

The channels “q” and “p” give the position/height and vertical velocity of the wave at each grid point, respectively. The channels “dqdt” and “dpdt” are time derivatives of these quantities. The vector “t” gives the simulation time for each snapshot in the trajectory.

Table 4: Data channels for the Wave system.  $N_t$  denotes the number of time steps in the trajectory, and  $N_p$  denotes the number of points in the spatial grid, determined by `n_grid`.

| Channel name | Shape        | Data type |
|--------------|--------------|-----------|
| q            | $(N_t, N_p)$ | float64   |
| p            | $(N_t, N_p)$ | float64   |
| dqdt         | $(N_t, N_p)$ | float64   |
| dpdt         | $(N_t, N_p)$ | float64   |
| t            | $(N_t)$      | float64   |

### D.2.4 Spring mesh

This system is identified by a `system` entry with value “spring-mesh”.

Under `system_args`, this system has a global parameter `vel_decay` which is a floating-point value configuring the damping applied to the velocity of each mass. Per-trajectory elements in `system_args.trajectory_defs` objects are `particles` and `springs`, which are both arrays of objects.

Each object in `particles` has three attributes: `is_fixed`, a boolean indicating whether this particle is fixed in place and immovable; `mass`, a floating-point value for the particle’s mass; and `position`, an array of two floating-point values giving the  $x$  and  $y$  coordinates of the particle’s initial position. The order of the particles is significant and their index in this array is their index referenced in `springs`, below.

The objects in the `springs` array have four attributes: `a`, `b`, `rest_length`, and `spring_const`. The values of `a` and `b` are integers specifying which two particles this spring connects in the order of the objects in the `particles` array. The springs are undirected so the order of `a` and `b` is not important. The values `rest_length` and `spring_const` are floats giving the rest length of the spring and its spring constant, respectively. In this work, the edges described in the array are one-hop nearest neighbors in each axis-aligned direction, and are the edges of the regular, square grid.

The metadata object has attributes repeating some values from `system_args`: `edges` is an array of objects repeating `springs` as described above, and `particles` repeats the corresponding array, both sourced from the first entry in `system_args.trajectory_defs`.

Beyond these in metadata are: `n_dim`, giving the spatial dimensions in which the particles move (in this work, always 2); `n_grid`, repeating the same value; `n_particles`, giving the length of the `particles` array; and the `vel_decay` value repeated here as well.

There are no system-specific entries in the objects in the `trajectories` array, other than the data channels. Some attributes of each of these are given in Table 5.

The channel “`q`” and “`p`” give the per-particle position and momentum, respectively. These values are provided in both  $x$  and  $y$  components for the two-dimensional space. The channels “`dqdt`” and “`dpdt`” give time derivatives for these quantities.

The channel “`t`” provides the simulation time at which each snapshot was taken.

The “`edge_indices`” gives the locations of the edges (the springs) between each particle. The integers in this channel index in the same order as the per-particle  $N_p$  dimension in the other channels. The values in this channel are directed so each spring is repeated twice, once with its two end indices in both orders.

The array for “`masses`” gives the mass of each particle in the same order as the  $N_p$  dimensions in other channels.

The channel “`fixed_mask`” is a boolean mask with `true` for each particle which is fixed in place. The channels “`fixed_mask_q`” and “`fixed_mask_p`” are the same, except with repeated values to be suitable for broadcasting.

Table 5: Data channels for the Spring-Mesh system.  $N_t$  denotes the number of time steps in the trajectory,  $N_p$  denotes the number of particles,  $N_e$  denotes the number of edges.

| Channel name                  | Shape           | Data type | Notes                                |
|-------------------------------|-----------------|-----------|--------------------------------------|
| <code>q</code>                | $(N_t, N_p, 2)$ | float64   |                                      |
| <code>p</code>                | $(N_t, N_p, 2)$ | float64   |                                      |
| <code>dqdt</code>             | $(N_t, N_p, 2)$ | float64   |                                      |
| <code>dpdt</code>             | $(N_t, N_p, 2)$ | float64   |                                      |
| <code>t</code>                | $(N_t)$         | float64   |                                      |
| <code>edge_indices</code>     | $(2, N_e)$      | int64     |                                      |
| <code>masses</code>           | $(N_p)$         | float64   |                                      |
| <code>fixed_mask</code>       | $(N_p)$         | bool      |                                      |
| <code>fixed_mask_q</code>     | $(N_p, 2)$      | bool      |                                      |
| <code>fixed_mask_p</code>     | $(N_p, 2)$      | bool      | Alias: “ <code>fixed_mask_q</code> ” |
| <code>extra_fixed_mask</code> | $(N_p)$         | bool      | Alias: “ <code>fixed_mask</code> ”   |

### D.2.5 Navier-Stokes

The Navier-Stokes system is identified by a `system` entry with value “`navier-stokes`”.

Under `system_args`, this system has a global parameter `grid_resolution` which is a floating-point value, giving the space stride of the regular grid on which the solutions are sampled. Per-trajectory elements in `system_args.trajectory_defs` objects are `viscosity` and `in_velocity`, which are parameters passed to the FEM solver giving the viscosity of the fluid and the velocity of the incoming flow, respectively. Both are floating-point values.

The objects in `system_args.trajectory_defs` also have a parameter `mesh` which describes the location of obstacles in the simulated space. Each entry in the array is an object with two keys: `radius`, a single floating point value for the radius of the circular obstacle, and `center`, an array of two floating point values giving the  $x$  and  $y$  position of the center of the circle. These values allow placing multiple obstacles in the simulation space and impact the mesh which is generated and used by the external finite element solver.

The metadata entry for this system contains two values: `grid_resolution` and `viscosity`, a copy of the same values as described above. The viscosity value is taken from the first trajectory entry.

The objects in the `trajectories` array have extra global parameter values: `in_velocity`, and `viscosity`, which are as discussed above. Their `field_keys` entries have mapped names for the data channels listed in Table 6. The “q”- and “p”-related channels are present as aliases for consistency with other systems.

The core values for this system are the “solutions” and “pressures” channels which store the flow velocity of the fluid and the pressure field, respectively. The two channels for the solutions are the  $x$  and  $y$  flow velocities.

Separately the “grads” and “pressures\_grads” channels store approximated time derivatives computed from neighboring time steps from the FEM solver’s output.

The “t” channel is a vector giving the simulation time of each snapshot.

The channels “vertices” and “edge\_indices” identify the spatial position and neighboring grid points for each sample point, respectively. “vertices” gives the  $x$ - and  $y$ -coordinates as separate channels, and “edge\_indices” stores indexes into the per-particle dimension  $N_p$  of each spatial value. The edges described in the array are one-hop nearest neighbors in each axis-aligned direction, the edges of the regular, square grid.

The “fixed\_mask” channels are boolean masks for the sample points, indicating which of them form part of the boundary or an obstacle. “fixed\_mask” itself stores a value of `true` for points which are either a boundary or an obstacle. The arrays “fixed\_mask\_solutions” and “fixed\_mask\_pressures” store the same, just repeated to match the dimensions of the corresponding data channels, suitable for broadcasting and masking or other purposes. The “extra\_fixed\_mask” is like “fixed\_mask” except that it provides boolean per-particle masks for *two* kinds of points. The last dimension of this mask separates the two sub-channels, one for each type of mask. Mask 0 has `true` for the obstacles and the boundaries, while mask 1 has `true` only for the obstacles.



Table 6: Data channels for Navier-Stokes system.  $N_t$  denotes the number of time steps in the trajectory, and  $N_p$  denotes the number of points in the regular grid.  $N_p = 9282$  for the datasets in this work.

| Channel name         | Shape           | Data type | Notes                         |
|----------------------|-----------------|-----------|-------------------------------|
| solutions            | $(N_t, N_p, 2)$ | float64   |                               |
| pressures            | $(N_t, N_p)$    | float64   |                               |
| grads                | $(N_t, N_p, 2)$ | float64   |                               |
| pressures_grads      | $(N_t, N_p)$    | float64   |                               |
| t                    | $(N_t)$         | float64   |                               |
| q                    | $(N_t, N_p)$    | float64   | Alias: “pressures”            |
| p                    | $(N_t, N_p, 2)$ | float64   | Alias: “solutions”            |
| dqdt                 | $(N_t, N_p)$    | float64   | Alias: “pressures_grads”      |
| dptdt                | $(N_t, N_p, 2)$ | float64   | Alias: “grads”                |
| edge_indices         | $(2, N_p)$      | int64     |                               |
| vertices             | $(N_p, 2)$      | float64   |                               |
| fixed_mask           | $(N_p)$         | bool      |                               |
| fixed_mask_solutions | $(N_p, 2)$      | bool      |                               |
| fixed_mask_pressures | $(N_p)$         | bool      |                               |
| fixed_mask_q         | $(N_p)$         | bool      | Alias: “fixed_mask_pressures” |
| fixed_mask_p         | $(N_p, 2)$      | bool      | Alias: “fixed_mask_solutions” |
| extra_fixed_mask     | $(N_p, 2)$      | bool      |                               |

### D.3 Data generation

The section above discussed how to make use of the stored data sets. Here we document the process used to configure these data sets and invoke the simulators to produce the snapshots. The steps used here cover the very similar process of running the neural network training and evaluation phases. Following the steps here on the run descriptions we have distributed allows recreating the experimental setup used in the report above.

#### D.3.1 Dependencies

This section includes instructions for configuring the software environment.

While the software we have produced for this work is available under an open source license, the required dependencies are made available under a variety of other licenses. These include some proprietary components such as NVIDIA’s CUDA libraries, and Intel’s Math Kernel Library (MKL). Review the licenses of the required dependencies before installing or running.

**Anaconda** The majority of software dependencies can be installed using the Conda package management tool (<https://docs.conda.io>). The root directory of our software project contains an environment definition in the file “environment.yml”. Using this file will create an environment `nn-benchmark` containing the Python dependencies needed for this project. If you are obtaining these dependencies from another source, the contents of this file include the names of the packages which will be required.

**PolyFEM** In addition to the Python libraries needed for the project, if you wish to *generate* new Navier-Stokes trajectories, you will also need a copy of PolyFEM. The source code for this software can be obtained from the PolyFEM GitHub repository (<https://github.com/polyfem/polyfem/>). This portion of the project requires a copy of PolyFEM linked with Intel’s Math Kernel Library (MKL). To do this, locate the root directory of your MKL installation and build PolyFEM from the root directory of its source code with:

```
mkdir build
cd build
MKLROOT=/path/to/mkl/root/ cmake .. -DPOLYSOLVE_WITH_PARDISO=ON -DPOLYFEM_NO_UI=ON
make
```

This will produce a binary `PolyFEM_bin`, required to produce new Navier-Stokes trajectories. This binary must either be placed in the directory from which you will run the simulation software, or you should specify the parent directory of this binary in the environment variable `POLYFEM_BIN_DIR` so that it can be located.

**Singularity container (optional)** It is possible to run the software directly in a manually-created Anaconda environment. However, for convenience we include a build definition file for a Singularity container (<https://singularity.hpcng.org>). Building a `.sif` container from this definition will produce an environment suitable for running the software, including PolyFEM and the required environment variables. Consult the Singularity documentation for more information on building these containers in your computing environment.

If you choose to use the Singularity container, either place it in the directory from which you will run the simulation software or provide the path to the resulting `nn-benchmark.sif` file's parent directory in the environment variable `SCRATCH`. The run management scripts (described below) will look in this directory for the container and use it to run jobs if it is found.

### D.3.2 Run descriptions

The software used to generate the datasets, train networks, and perform evaluations takes arguments from JSON files, specified on the command line. This makes it possible to provide a large number of arguments, to submit the jobs in batches, and to detect tasks that have failed or that remain outstanding. The structure of these files is relatively complex, so we provide additional tooling to assist in generating them.

These utilities are located in the `src/run_generators` directory, in `utils.py`. Examples of their use are included in the other Python scripts in that directory. These tools consist of several object definitions which define jobs to run. These are divided into three phases: data generation, network training, and evaluation. To produce the descriptions of the desired jobs, one constructs Python objects representing each of these, and calls their `write_description(dir)` methods. This method takes a single argument: the root directory under which the job descriptions and the resulting outputs will be stored. Create a new directory for each experiment.

Each task takes an `Experiment` object as an argument; this principally sets a prefix on the resulting file names, and records the experiment name in the run description file. This separation is not enforced and results of jobs combining different `Experiment` objects can freely be mixed.

Datasets are generated by creating various `Dataset` subclass objects. Each of these takes as an argument an `InitialConditionSource` which provides the sampling of initial conditions described above. Be aware that these objects cache the initial conditions they have previously generated. This ensures that larger datasets drawn from the same source are always strict supersets of smaller datasets. The initial condition sources have parameters which control the distribution from which samples are drawn, and the datasets themselves have parameters controlling the simulations which are carried out from these samples (such as the time step size, number of steps, etc.). The `InitialConditionSource` objects do not represent jobs and do not have `write_description` methods.

Neural network training tasks are created by providing both an `Experiment` object and two datasets: one for training, and one for validation. The objects representing each dataset are provided as constructor arguments to the objects representing each type of neural network. Most networks have parameters which control their architecture, choosing kernel sizes, hidden dimensions, etc.

Finally, evaluation run descriptions are generated by the `NetworkEvaluation` object. This takes an `Experiment` object, the object representing the network training task, an object for the evaluation set to use, and the numerical integrator to combine with the network. The exception to this is configuring runs for the KNNs. These do not have a normal training phase and run entirely at evaluation-time. These evaluation objects take an additional parameter for their training dataset. When run, the job will load this training set, fit the KNN, and then proceed with the rest of the regular evaluation phase. `KNNPredictorOneshot` runs a KNN for step prediction and `KNNRegressorOneshot` runs a KNN for derivative prediction with the integrator specified as an argument to its constructor.

As an illustration of configuring jobs using these utilities we provide the Python scripts used to generate the run descriptions for the experiments discussed above. Be aware that running these scripts

will sample *new* datasets from the distributions specified above. Each script takes the name of the directory created for its experiment as an argument and writes the run descriptions to that directory in a `descr` directory, with three subdirectories, one for each of the three phases.

### D.3.3 Launching jobs

Once the run descriptions are generated, running the jobs is in large part managed by the `manage_runs.py` script. This script can inspect the experiment directory to identify runs which are outstanding, appear possibly incomplete, or whose description files have been modified after the job was launched. The script also runs the jobs from the description file, either serially, or in parallel by submitting to a Slurm queue.

**Scanning** Running `python manage_runs.py scan <experiment directory>` will output information about the state of all jobs in that experiment. The script will indicate whether the jobs are yet to be run (outstanding), appear to be incomplete, or whether their descriptions were modified after the job launched. Jobs in one of the error states (incomplete or mismatched descriptions) can be deleted by adding the `--delete=<mismatch or incomplete>` argument. This extra flag deletes the jobs in the specified state with *no* further confirmation.

**Launching** `python manage_runs.py launch <experiment directory> <phase>` where phase is one of `data_gen`, `train`, or `eval` will launch all outstanding jobs for the specified experiment and phase. Wait for all jobs from earlier phases to complete before beginning the next phase. By default the script will attempt to run the jobs locally in serial, but if the `sbatch` program is detected it will submit jobs to the Slurm queue instead. This selection can be overridden by passing one of `slurm` or `local` to the `--launch_type` argument. If the Singularity container is being used the script may output a warning that the “nn-benchmark” Anaconda environment is not loaded. This warning can be ignored as the container will provide the necessary environment.

### D.3.4 Recreating experiments

We provide the JSON run descriptions for the experiments discussed above. Once the software environment is configured, the `manage_runs.py` script can be used to launch copies of these experiments.

## References

- [1] A. C. Antoulas and B. D. O. Anderson. On the scalar rational interpolation problem. *IMA Journal of Mathematical Control & Information*, 3(2-3):61–88, 1986.
- [2] A. C. Antoulas, C. Beattie, and S. Gugercin. *Interpolatory Methods for Model Reduction*. SIAM, 2020.
- [3] S. L. Brunton, J. L. Proctor, and J. N. Kutz. Discovering governing equations from data by sparse identification of nonlinear dynamical systems. *Proceedings of the National Academy of Sciences*, 113(15):3932–3937, 2016.
- [4] Z. Chen, J. Zhang, M. Arjovsky, and L. Bottou. Symplectic recurrent neural networks. In *International Conference on Learning Representations*, 2020.
- [5] P. V. Coveney, E. R. Dougherty, and R. R. Highfield. Big data need big theory too. *Philosophical Transactions of the Royal Society A: Mathematical, Physical and Engineering Sciences*, 374(2080):20160153, 2016. doi: 10.1098/rsta.2016.0153. URL <https://royalsocietypublishing.org/doi/abs/10.1098/rsta.2016.0153>.
- [6] M. Cranmer, A. Sanchez-Gonzalez, P. Battaglia, R. Xu, K. Cranmer, D. Spergel, and S. Ho. Discovering symbolic models from deep learning with inductive biases. *arXiv preprint*, 2020. URL <https://arxiv.org/abs/2006.11287>.
- [7] J. P. Crutchfield and B. S. Mcnamara. Equations of motion from a data series. *Complex Systems*, page 452, 1987.
- [8] S. Greydanus, M. Dzamba, and J. Yosinski. Hamiltonian neural networks. In H. Walsch, H. Larochelle, A. Beygelzimer, F. d’Alché Buc, E. Fox, and R. Garnett, editors,

- Advances in Neural Information Processing Systems*, volume 32, pages 15379–15389. Curran Associates, Inc., 2019. URL <https://proceedings.neurips.cc/paper/2019/file/26cd8ecadce0d4efd6cc8a8725cbd1f8-Paper.pdf>.
- [9] B. Gustavsen and A. Semlyen. Rational approximation of frequency domain responses by vector fitting. *Power Delivery, IEEE Transactions on*, 14(3):1052–1061, Jul 1999.
  - [10] E. Haghighat, M. Raissi, A. Moure, H. Gomez, and R. Juanes. A deep learning framework for solution and discovery in solid mechanics, 2020.
  - [11] E. Hairer and G. Wanner. *Solving Ordinary Differential Equations II: Stiff and Differential-Algebraic Problems*. Springer, 2009.
  - [12] E. Hairer, S. P. Nørsett, and G. Wanner. *Solving Ordinary Differential Equations I: Nonstiff Problems*. Springer, 2009.
  - [13] C. R. Harris, K. J. Millman, S. J. van der Walt, R. Gommers, P. Virtanen, D. Cournapeau, E. Wieser, J. Taylor, S. Berg, N. J. Smith, R. Kern, M. Picus, S. Hoyer, M. H. van Kerkwijk, M. Brett, A. Haldane, J. F. del Río, M. Wiebe, P. Peterson, P. Gérard-Marchant, K. Sheppard, T. Reddy, W. Weckesser, H. Abbasi, C. Gohlke, and T. E. Oliphant. Array programming with NumPy. *Nature*, 585(7825):357–362, 2020. URL <https://doi.org/10.1038/s41586-020-2649-2>.
  - [14] J. D. Hunter. Matplotlib: A 2D graphics environment. *Computing in Science & Engineering*, 9(3):90–95, 2007. doi: 10.1109/MCSE.2007.55.
  - [15] A. Khadilkar, J. Wang, and R. Rai. Deep learning-based stress prediction for bottom-up SLA 3D printing process. *The International Journal of Advanced Manufacturing Technology*, 102(5):2555–2569, Jun 2019. ISSN 1433-3015. doi: 10.1007/s00170-019-03363-4. URL <https://doi.org/10.1007/s00170-019-03363-4>.
  - [16] B. Kim, V. C. Azevedo, N. Thuerey, T. Kim, M. Gross, and B. Solenthaler. Deep fluids: A generative network for parameterized fluid simulations. *Computer Graphics Forum*, 38(2):59–70, 2019.
  - [17] D. P. Kingma and J. Ba. Adam: A method for stochastic optimization. *arXiv preprint arXiv:1412.6980*, 2014.
  - [18] T. Kipf, E. Fetaya, K.-C. Wang, M. Welling, and R. Zemel. Neural relational inference for interacting systems. In *International Conference on Machine Learning*, pages 2688–2697. PMLR, 2018.
  - [19] G. Kissas, Y. Yang, E. Hwuang, W. R. Witschey, J. A. Detre, and P. Perdikaris. Machine learning in cardiovascular flows modeling: Predicting arterial blood pressure from non-invasive 4D flow MRI data using physics-informed neural networks. *Computer Methods in Applied Mechanics and Engineering*, 358:112623, 2020.
  - [20] G. M. Kurtzer, V. Sochat, and M. W. Bauer. Singularity: Scientific containers for mobility of compute. *PLOS ONE*, 12(5), 5 2017. doi: 10.1371/journal.pone.0177459.
  - [21] S. K. Lam, A. Pitrou, and S. Seibert. Numba: A LLVM-based Python JIT compiler. In *Proceedings of the Second Workshop on the LLVM Compiler Infrastructure in HPC*, LLVM ’15, New York, NY, USA, 2015. Association for Computing Machinery. ISBN 9781450340052. doi: 10.1145/2833157.2833162. URL <https://doi.org/10.1145/2833157.2833162>.
  - [22] Y. Li, H. Wang, K. Mo, and T. Zeng. Reconstruction of simulation-based physical field by reconstruction neural network method. *arXiv preprint arXiv:1805.00528*, 2018.
  - [23] Y. Li, H. Wang, W. Shuai, H. Zhang, and Y. Peng. Image-based reconstruction for the impact problems by using DPNNs. *arXiv preprint arXiv:1905.03229*, 2019.
  - [24] L. Liang, M. Liu, C. Martin, and W. Sun. A deep learning approach to estimate stress distribution: a fast and accurate surrogate of finite-element analysis. *Journal of The Royal Society Interface*, 15(138):20170844, 2018. doi: 10.1098/rsif.2017.0844. URL <https://royalsocietypublishing.org/doi/abs/10.1098/rsif.2017.0844>.
  - [25] L. Liang, W. Mao, and W. Sun. A feasibility study of deep learning for predicting hemodynamics of human thoracic aorta. *Journal of Biomechanics*, 99:109544, 2020.
  - [26] L. Lu, X. Meng, Z. Mao, and G. E. Karniadakis. DeepXDE: A deep learning library for solving differential equations. *arXiv preprint arXiv:1907.04502*, 2019.

- [27] G. D. Maso Talou, T. P. Babarenda Gamage, M. Sagar, and M. P. Nash. Deep learning over reduced intrinsic domains for efficient mechanics of the left ventricle. *Frontiers in Physics*, 8:30, 2020.
- [28] Y. Nakatsukasa, O. Sète, and L. N. Trefethen. The AAA algorithm for rational approximation. *SIAM Journal on Scientific Computing*, 40(3):A1494–A1522, 2018.
- [29] Z. Nie, H. Jiang, and L. B. Kara. Stress field prediction in cantilevered structures using convolutional neural networks. *Journal of Computing and Information Science in Engineering*, 20(1), 2020.
- [30] N. H. Packard, J. P. Crutchfield, J. D. Farmer, and R. S. Shaw. Geometry from a time series. *Physical Review Letters*, 45:712–716, 1980.
- [31] A. Paszke, S. Gross, F. Massa, A. Lerer, J. Bradbury, G. Chanan, T. Killeen, Z. Lin, N. Gimelshein, L. Antiga, A. Desmaison, A. Kopf, E. Yang, Z. DeVito, M. Raison, A. Tejani, S. Chilamkurthy, B. Steiner, L. Fang, J. Bai, and S. Chintala. PyTorch: An imperative style, high-performance deep learning library. In H. Wallach, H. Larochelle, A. Beygelzimer, F. d’Alché Buc, E. Fox, and R. Garnett, editors, *Advances in Neural Information Processing Systems 32*, pages 8024–8035. Curran Associates, Inc., 2019.
- [32] F. Pedregosa, G. Varoquaux, A. Gramfort, V. Michel, B. Thirion, O. Grisel, M. Blondel, P. Prettenhofer, R. Weiss, V. Dubourg, J. Vanderplas, A. Passos, D. Cournapeau, M. Brucher, M. Perrot, and E. Duchesnay. Scikit-learn: Machine learning in Python. *Journal of Machine Learning Research*, 12:2825–2830, 2011.
- [33] L. Peng and K. Mohseni. Symplectic model reduction of hamiltonian systems. *SIAM Journal on Scientific Computing*, 38(1):A1–A27, 2016. URL <https://doi.org/10.1137/140978922>.
- [34] T. Pfaff, M. Fortunato, A. Sanchez-Gonzalez, and P. W. Battaglia. Learning mesh-based simulation with graph networks. *arXiv preprint*, 2020. URL <https://arxiv.org/abs/2010.03409>.
- [35] E. Qian, B. Kramer, B. Peherstorfer, and K. Willcox. Lift & learn: Physics-informed machine learning for large-scale nonlinear dynamical systems. *Physica D: Nonlinear Phenomena*, 2020.
- [36] A. Rahimi and B. Recht. Random features for large-scale kernel machines. In J. Platt, D. Koller, Y. Singer, and S. Roweis, editors, *Advances in Neural Information Processing Systems*, volume 20. Curran Associates, Inc., 2008. URL <https://proceedings.neurips.cc/paper/2007/file/013a006f03dbc5392effeb8f18fda755-Paper.pdf>.
- [37] M. Raissi, P. Perdikaris, and G. E. Karniadakis. Physics informed deep learning (part ii): Data-driven discovery of nonlinear partial differential equations. *arXiv preprint arXiv:1711.10561*, 2017.
- [38] M. Raissi, P. Perdikaris, and G. E. Karniadakis. Physics-informed neural networks: A deep learning framework for solving forward and inverse problems involving nonlinear partial differential equations. *Journal of Computational Physics*, 378:686–707, 2019.
- [39] M. D. Ribeiro, A. Rehman, S. Ahmed, and A. Dengel. DeepCFD: Efficient steady-state laminar flow approximation with deep convolutional neural networks. *arXiv preprint arXiv:2004.08826*, 2020.
- [40] A. Rudi, L. Carratino, and L. Rosasco. Falcon: An optimal large scale kernel method. *arXiv preprint arXiv:1705.10958*, 2017.
- [41] A. Sanchez-Gonzalez, N. Heess, J. T. Springenberg, J. Merel, M. Riedmiller, R. Hadsell, and P. Battaglia. Graph networks as learnable physics engines for inference and control. In *International Conference on Machine Learning*, pages 4470–4479. PMLR, 2018.
- [42] A. Sanchez-Gonzalez, V. Bapst, K. Cranmer, and P. Battaglia. Hamiltonian graph networks with ODE integrators. *arXiv preprint*, 2019. URL <https://arxiv.org/abs/1909.12790>.
- [43] H. Schaeffer. Learning partial differential equations via data discovery and sparse optimization. *Proceedings of the Royal Society A: Mathematical, Physical and Engineering Sciences*, 473(2197):20160446, 2017.
- [44] H. Schaeffer, G. Tran, and R. Ward. Extracting sparse high-dimensional dynamics from limited data. *SIAM Journal on Applied Mathematics*, 78(6):3279–3295, 2018.
- [45] P. Schmid. Dynamic mode decomposition of numerical and experimental data. *Journal of Fluid Mechanics*, 656:5–28, 8 2010. ISSN 1469-7645.
- [46] P. Schmid and S. J. Dynamic mode decomposition of numerical and experimental data. In *Bull. Amer. Phys. Soc., 61st APS meeting*, page 208. American Physical Society, 2008.
- [47] T. Schneider, J. Dumas, X. Gao, D. Zorin, and D. Panozzo. PolyFEM. <https://polyfem.github.io/>, 2019.

- [48] B. Schölkopf and A. J. Smola. *Learning with Kernels*. MIT Press, 1998.
- [49] E. Süli and D. F. Mayers. *An Introduction to Numerical Analysis*, chapter Initial Value Problems for ODEs, pages 349–353. Cambridge University Press, 2003.
- [50] A. M. Tartakovsky, C. O. Marrero, P. Perdikaris, G. D. Tartakovsky, and D. Barajas-Solano. Learning parameters and constitutive relationships with physics informed deep neural networks. *arXiv preprint arXiv:1808.03398*, 2018.
- [51] N. Thuerey, K. Weißenow, L. Prantl, and X. Hu. Deep learning methods for reynolds-averaged navier-stokes simulations of airfoil flows. *AIAA Journal*, 58(1):25–36, 2020.
- [52] J. H. Tu, C. W. Rowley, D. M. Luchtenburg, S. L. Brunton, and J. N. Kutz. On dynamic mode decomposition: Theory and applications. *Journal of Computational Dynamics*, 1(2):391–421, 2014.
- [53] N. Umetani and B. Bickel. Learning three-dimensional flow for interactive aerodynamic design. *ACM Transactions on Graphics (TOG)*, 37(4):1–10, 2018.
- [54] P. Virtanen, R. Gommers, T. E. Oliphant, M. Haberland, T. Reddy, D. Cournapeau, E. Burovski, P. Peterson, W. Weckesser, J. Bright, S. J. van der Walt, M. Brett, J. Wilson, K. J. Millman, N. Mayorov, A. R. J. Nelson, E. Jones, R. Kern, E. Larson, C. J. Carey, Í. Polat, Y. Feng, E. W. Moore, J. VanderPlas, D. Laxalde, J. Perktold, R. Cimrman, I. Henriksen, E. A. Quintero, C. R. Harris, A. M. Archibald, A. H. Ribeiro, F. Pedregosa, P. van Mulbregt, and SciPy 1.0 Contributors. SciPy 1.0: Fundamental Algorithms for Scientific Computing in Python. *Nature Methods*, 17:261–272, 2020. URL <https://doi.org/10.1038/s41592-019-0686-2>.
- [55] K. E. Willcox, O. Ghattas, and P. Heimbach. The imperative of physics-based modeling and inverse theory in computational science. *Nature Computational Science*, 1(3):166–168, Mar 2021. ISSN 2662-8457. doi: 10.1038/s43588-021-00040-z. URL <https://doi.org/10.1038/s43588-021-00040-z>.
- [56] Y. Xie, E. Franz, M. Chu, and N. Thuerey. TempoGAN: A temporally coherent, volumetric GAN for super-resolution fluid flow. *ACM Transactions on Graphics (TOG)*, 37(4):1–15, 2018.
